# Supplementary material
Source: publisher figshare collection journal article supplement (https://aacr.figshare.com/articles/dataset/_/22490321)
Supplement: Supplementary file 1 [file 39941954]

**Fig. S5**

**A**

|                                           |                                                                                          | Clone 9                     | Clone 4                     | Clone 7     |
|-------------------------------------------|------------------------------------------------------------------------------------------|-----------------------------|-----------------------------|-------------|
| Positive Cell Pellet                      |                                                                                          | Staining                    | Staining                    | Staining    |
| Epithelium                                | Esophageal and salivary gland (cytoplasm)                                                | 1-2+ (occas)                | No staining                 | No staining |
|                                           | Testis ( <u>membrane</u> & cytoplasm)                                                    | No staining                 | <b>1-3+ (rare to occas)</b> | No staining |
|                                           | Pancreas, skin, tonsil, anterior pituitary (cytoplasm)                                   | No staining                 | 1-3+ (rare to occas)        | No staining |
| Myoepithelium                             | Mammary gland (cytoplasm)                                                                | 1-3+ (freq)                 | No staining                 | No staining |
| Mononuclear cells                         | Esophagus, pancreas, pituitary (interstitium), and tonsil ( <u>membrane</u> & cytoplasm) | <b>1-3+ (rare to occas)</b> | No staining                 | No staining |
| Reticular cells and fibers                | Lymph node and spleen ( <u>membrane</u> & cytoplasm)                                     | <b>2-4+ (freq)</b>          | No staining                 | No staining |
| Vascular and/or intrinsic smooth myocytes | > 30 human tissues (cytoplasm)                                                           | 1-4+ (occas to freq)        | No staining                 | No staining |
| Adipocytes                                | Pancreas (cytoplasm)                                                                     | No staining                 | 1-3+ (rare)                 | No staining |

**B**

|                      |                                                            | Clone 4                           | Clone 7     |
|----------------------|------------------------------------------------------------|-----------------------------------|-------------|
| Positive Cell Pellet |                                                            | Staining                          | Staining    |
| Negative Cell Pellet |                                                            | No Staining                       | No Staining |
| Epithelium           | <b>Pancreas, acini and duct (membrane &amp; cytoplasm)</b> | <b>1-3+ (occas), all 3 donors</b> | No staining |
|                      | Testis, Spermatogenic cells ( <u>membrane</u> & cytoplasm) | 1-3+ (rare to freq), all 3 donors | No staining |
| Amnion               | Placenta ( <u>membrane</u> & cytoplasmic)                  | 1-3+ (freq), 1 of 3 donors        | No staining |

**C**

|                      |                                                  | Clone 4(Lot 1)                    | Clone 4(Lot 2)                    |
|----------------------|--------------------------------------------------|-----------------------------------|-----------------------------------|
| Positive Cell Pellet |                                                  | Staining                          | Staining                          |
| Negative Cell Pellet |                                                  | No Staining                       | No Staining                       |
| Pancreas             | <b>Membrane staining</b>                         | <b>No staining (all 8 donors)</b> | <b>No staining (all 8 donors)</b> |
|                      | Extracellular material in duct and acinar lumina | 1-3+, rare (1 of 8 donors)        | 1-3+, rare (1 of 8 donors)        |
|                      | Cytoplasm of duct epithelial cells               | No staining                       | 1+, rare (1 of 8 donors)          |

For panels A-C, 1+ = weak, 2+ = moderate, 3+ = strong, 4+ = intense, occas = occasional, freq = frequent. Frequency modifiers were included to provide the approximate percentage staining of expected numbers of that cell type or tissue element at that location. The frequency of cells with staining was identified as follows: very rare (<1% of cells of a particular cell type); rare (1-5% of cells of a particular cell type); rare to occasional (>5-25% of cells of a particular cell type); occasional (>25-50% of cells of a particular type); occasional to frequent (>50-75% of cells of a particular cell type); frequent (>75-100% of cells of a particular cell type).

**Fig. S5 continued**

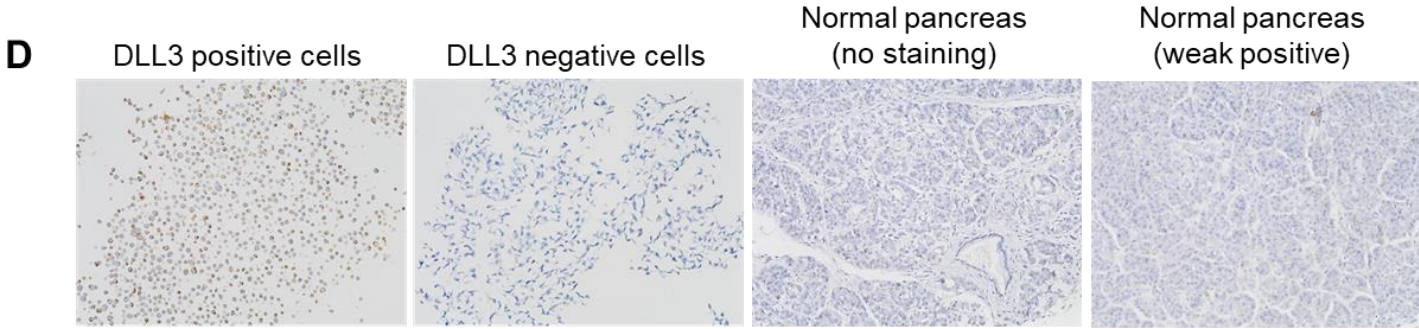

**E**

|                                 |             |                                                 |
|---------------------------------|-------------|-------------------------------------------------|
| Normal pancreatic tissue (N=20) | <b>N=16</b> | <b>No staining</b>                              |
|                                 | N=2         | Equivocal positive staining (cytoplasmic), rare |
|                                 | N=2         | Weak positive staining (cytoplasmic), rare      |

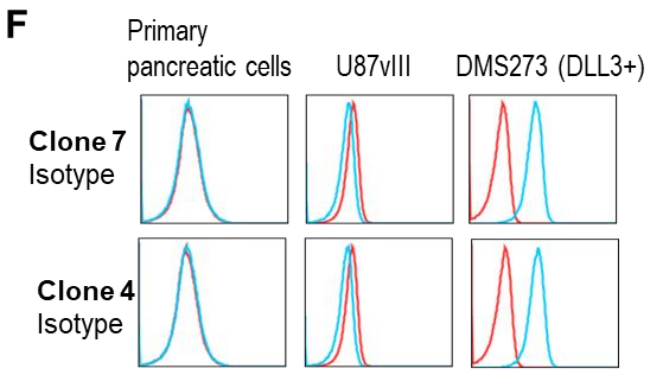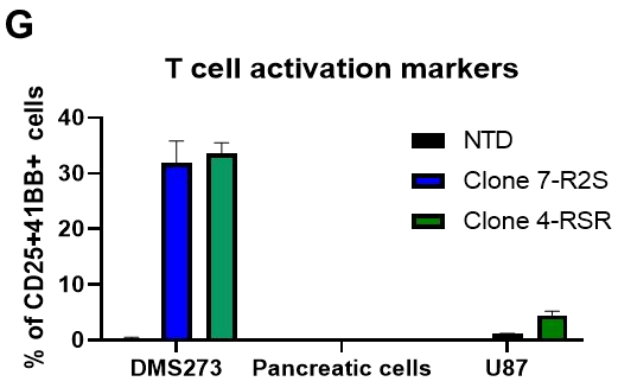

**H**

|                                            | Age matched control (n=3) | Clone 4-RSR (n=5)           |
|--------------------------------------------|---------------------------|-----------------------------|
| Infiltration                               | No infiltration           | Minimal (n=1)<br>Mild (n=1) |
| Decreased secretory material (acinar cell) | No findings               | Minimal (n=1)<br>Mild (n=4) |

**Fig. S5. Clone 4 showed pancreatic membrane staining in one of three TCR studies but other derisking studies suggest the staining may be artifactual.** (A) Clone 9 showed off-target binding to multiple tissues in initial TCR study and was eliminated as a candidate. The scFv binding domains of clone 4, 7 and 9 were fused to a human IgG2 Fc fragment and assayed using immunohistochemistry (IHC) against a panel of 36 human tissues to evaluate binding from 1 donor. Results are shown for staining at 10 mg/mL. DLL3-positive and negative cell pellets were utilized as controls. Staining was scored by a board-certified pathologist on both intensity and frequency. Scoring is shown for control cell pellets and for tissues in which positive staining with either CARs 9 or 4 was observed. (B) Membrane staining of clone 4 was observed in epithelial cells in the pancreas (acini, ducts), amnion in the placenta and spermatogenic cells in the testis. The scFv binding domains of clone 4 and 7 were tested using methods described in (A) against a panel of 36 human tissues to evaluate binding from 3 donors. Results are shown for staining at 10 µg/mL. Scoring is shown for control cell pellets and for tissues in which membrane staining with clone 4 was observed. (C) Follow-up study to further evaluate pancreatic membrane staining was performed using the same protocol with 8 additional human donors and two lots of clone 4 soluble binding domain. No pancreatic membrane staining was observed in any donors. (D) Additional IHC work was performed in-house and no pancreatic membrane staining was observed. Representative images of clone 4 staining on DLL3-positive cells, DLL3-negative cells and 2 normal pancreas samples were shown. (E) In-house IHC staining of 20 normal pancreas samples (US Biomax) was reviewed by a pathologist. Staining pattern and intensity was summarized in the table. (F) Clone 4 and clone 7 showed binding to DLL3 positive DMS273 cells but not to human primary pancreatic cells. Data from one representative donor is shown. (G) Clone 4 and clone 7 CAR T cells are not activated after co-cultured with primary pancreatic cells for 2 days at an E:T of 2:1. Error bars represent standard deviation, n=4 technical replicates. Experiments were performed 3 times with DLL3 CAR Ts generated from different donors. Data from one representative donor is shown. (H) DLL3 CAR T cells-related changes in pancreas are limited to minimal/mild zymogen decrease and lymphocyte infiltrates. Animals bearing SHP-77 subcutaneous tumors received a single dose of NTD or DLL3 CAR T cells ( $5 \times 10^6$  CAR+ per animal). After tumor clearance, pancreas tissues were collected, H&E stained and analyzed by a pathologist.
